# Supplementary material for: Nature of frontier quasi-particle states in nitrogen-base systems
Source: Royal Society of Chemistry journal article supplement (doi:10.1039/d5cp03861h), 2026-01-01
Supplement: d5cp03861h2.pdf [file d5cp03861h2.pdf]

## Supplementary-Information materials for: Nature of frontier quasi-particle states in nitrogen-base systems

Raul Quintero-Monsebaiz, Per Hyldgaard, and Elsebeth Schröder

*Department of Microtechnology and Nanoscience – MC2, Chalmers University of Technology, SE-41296 Gothenburg, Sweden*

(Dated: December 21, 2025)

We here document accuracy of the AHBR-mRSH\* generalized-Kohn-Sham functional [J. Phys.:Condens. Matter **32**, 211501 (2025)] as a predictor of frontier-level quasiparticles (QPs) in nitrogen-base system. To that end we supplement (and slightly correct) the originally reported comparison of AHBR-mRSH\* frontier level QP energies against more literature theory values and against here-presented results on the preformance of HSE06 [J. Chem. Phys. **124**, 219906 (2006)] as an approximate QP-energy predictor.

This supplementary-information (SI) document contains Tables S.I and S.II substantiating our accuracy for predicting quasiparticle (QP) levels of nitrogen-base system by use of our optimally tuned AHBR-mRSH\* functional [2] for generalized Kohn-Sham (gKS) density functional theory (DFT) calculations.

In practice, we compare our AHBR-mRSH\* predictions with literature theory and experimental results that

TABLE S I. Documentation of accuracy for frontier-quasi-particle energies (or ‘levels’): individual T and A nitrogen bases. We take the atomic configuration as set by the positions that are defined by the TpC step in a benchmark [1]; See also zipped collection of coordinate files. All quasiparticle levels in eV.

|         |                                            | HOMO-1 | HOMO   | LUMO   | LUMO+1 |
|---------|--------------------------------------------|--------|--------|--------|--------|
| Thymine | AHBR-mRSH* <sup>a</sup>                    | -9.778 | -8.910 | -0.070 | -0.008 |
|         | HSE06                                      | -7.365 | -6.705 | -0.687 | -1.681 |
|         | G <sub>0</sub> W <sub>0</sub> <sup>b</sup> | -8.94  | -8.63  | 0.26   | -0.24  |
|         | GW <sup>c</sup>                            | -10.41 | -9.05  |        | 0.67   |
|         | LC-BLYP <sup>d</sup>                       | -9.71  | -8.90  |        | 0.59   |
|         | Exper. <sup>e</sup>                        | -10.14 | -9.2   | -0.06  | ~0.4   |
|         | KIPZ <sup>f</sup>                          | -9.77  | -9.02  | -0.06  | 0.32   |
| Adenine | AHBR-mRSH*                                 | -9.236 | -8.214 | 0.007  | 0.121  |
|         | HSE06                                      | -6.848 | -6.067 | -0.460 | -1.081 |
|         | G <sub>0</sub> W <sub>0</sub> <sup>b</sup> | -8.80  | -7.99  | 0.31   | 0.25   |
|         | GW <sup>c</sup>                            | -9.47  | -8.22  |        | 1.14   |
|         | LC-BLYP <sup>d</sup>                       | -9.21  | -8.21  |        | 1.13   |
|         | Exper. <sup>e</sup>                        | -9.45  | -8.47  | 0.012  | ~0.5   |
|         | KIPZ <sup>f</sup>                          | -9.01  | -8.41  | 0.02   | 0.47   |

<sup>a</sup>Minute adjustment of Thymine HOMO-1 level energy compared to original characterization [2].

<sup>b</sup>Ref. 3.

<sup>c</sup>Ref. 4.

<sup>d</sup>Ref. 5.

<sup>e</sup>Ref. 3.

<sup>e</sup>Collected in Ref. 6.

<sup>f</sup>Ref. 6.

TABLE S II. Documentation of accuracy for frontier-quasi-particle energies (or ‘levels’): individual C and G nitrogen bases.

|          |                                            | HOMO-1 | HOMO   | LUMO   | LUMO+1 |
|----------|--------------------------------------------|--------|--------|--------|--------|
| Cytosine | AHBR-mRSH <sup>*a</sup>                    | -9.174 | -8.565 | -0.110 | 0.072  |
|          | HSE06                                      | -6.777 | -6.344 | -0.718 | -1.488 |
|          | G <sub>0</sub> W <sub>0</sub> <sup>b</sup> | -8.5   | -8.18  | 0.23   | 0.02   |
|          | GW <sup>c</sup>                            | -9.52  | -8.73  |        | 0.91   |
|          | LC-BLYP <sup>d</sup>                       | -9.37  | -8.73  |        | 0.93   |
|          | Exper. <sup>e</sup>                        | -9.55  | -8.89  | -0.23  | ~0.4   |
|          | KIPZ <sup>f</sup>                          | -9.12  | -8.70  | -0.11  | 0.41   |
| Guanine  | AHBR-mRSH <sup>*a</sup>                    | -9.350 | -7.816 | -0.165 | 0.050  |
|          | HSE06                                      | -6.929 | -5.679 | -0.942 | -0.639 |
|          | G <sub>0</sub> W <sub>0</sub> <sup>b</sup> | -8.67  | -7.64  | -      | 0.43   |
|          | GW <sup>c</sup>                            | -9.82  | -7.81  |        | 1.58   |
|          | LC-BLYP <sup>d</sup>                       | -9.29  | -7.78  |        | 1.69   |
|          | Exper. <sup>e</sup>                        | -9.90  | -8.30  | -      | -      |
|          | KIPZ <sup>f</sup>                          | -9.25  | -8.07  | -0.08  | 0.36   |

<sup>a</sup>Results for cytosine, guanine (and adenine) are unchanged from Ref. 2.

<sup>b</sup>Ref. 3.

<sup>c</sup>Ref. 4.

<sup>d</sup>Ref. 5.

<sup>e</sup>Ref. 3.

<sup>e</sup>Collected in Ref. 6.

<sup>f</sup>Ref. 6.

exist for the individual nitrogen bases and we document that AHBR-mRSH\* provides significant accuracy gains for predictions of nitrogen-base QP levels, compared with, for example, HSE06 [7, 8] and optimally-tuned long-range-corrected BLYP [5] gKS DFT studies. Our performance-comparison work amounts to an extension of the accuracy documentation that we originally provided in Ref. [2], finding only a minute adjustment ( $-9.776 \rightarrow -9.778$  eV) of one thymine QP level.

We note that the measured lowest-unoccupied molecular orbitals (LUMOs) are dipole-trapped states (or charge-transfer states), something that is also corrected predicted in so-called KIPZ studies [6]. Following Ref. 6, we therefore list as the LUMO energy in any given theory study, the energy of the first orbital has this dipole-trapped nature (when known).

We finally note, as also observed in the main text, that Fig. 5 of Ref. [2] contains documentation that use of AHBR-mRSH\* as a traditional total-energy predictor simultaneously gives about an order-of magnitude accuracy improvements over HSE06 and over dispersion-corrected HSE06.

- 
- [1] H. Kruse, P. Banas, and J. Sponer, Investigations of Stacked DNA Base-Pair Steps: Highly Accurate Stacking Interaction Energies, Energy Decomposition, and Many-Body Stacking Effects, *J. Chem. Theory Comput.* **15**, 95 (2019).
- [2] E. Schröder, R. Quintero-Monsebaiz, Y. Jiao, and P. Hyldgaard, Optimally tuned range-separated hybrid van der Waals density functional for molecular binding and quasiparticle characterizations, *J. Phys.: Condens. Matter* **37**, 211501 (2025).

- [3] X. Qian, P. Umari, and N. Marzari, Photoelectron properties of DNA and RNA bases from many-body perturbation theory, *Phys. Rev. B* **84**, 075103 (2011).
- [4] V. Faber, C. Attaccalite, V. Olevano, E. Runge, and X. Blase, First-Principles GW Calculations for DNA and RNA Nucleobases, *Phys. Rev. B.* **83**, 115123 (2011).
- [5] M. E. Foster and B. M. Wong, Nonempirically Tuned Range-Separated DFT Accurately Predicts Both Fundamental and Excitation Gaps in DNA and RNA Nucleobases, *J. Chem. Theo. Comput.* **8**, 2682 (2008).
- [6] N. L. Nguyen, G. Borghi, A. Ferretti, and N. Marzari, First-Principles Photoemission Spectroscopy of DNA and RNA Nucleobases from Koopmans-Compliant Functionals, *J. Chem. Theory Comput.* **12**, 3948 (2016).
- [7] J. Heyd, G. E. Scuseria, and M. Ernzerhof, Hybrid functionals based on a screened Coulomb potential, *J. Chem. Phys.* **118**, 8207 (2003).
- [8] J. Heyd, G. E. Scuseria, and M. Ernzerhof, Erratum: "Hybrid functionals based on a screened Coulomb potential" [*J. Chem. Phys.* 118, 8207 (2003)], *J. Chem. Phys.* **124**, 219906 (2006).
